# Supplementary material for: Insights into centriole geometry revealed by cryotomography of doublet and triplet centrioles
Source: eLife journal article supplement (doi:10.7554/elife.36851), 2018-08-06
Supplement: supp [file elife_poa_e36851_Figure_1_figure_supplement_2_source_data_1.xlsx]

## Sheet: Sheet1
Resolution	CHO whole-population FSC	CHO prox-population FSC	CHO dist-population FSC	S2 whole-population FSC
0	1	1	1	1
0.000814996	1	1	1	1
0.00163	1	1	1	1
0.002445	1	1	1	1
0.00326	1	1	1	1
0.004075	1	1	1	1
0.00489	1	1	1	1
0.005705	1	1	1	1
0.00652	1	1	1	1
0.007335	1	1	1	1
0.00815	1	1	1	1
0.008965	1	1	1	1
0.00978	1	1	1	1
0.010595	1	1	1	1
0.01141	1	1	1	1
0.012225	1	1	1	1
0.01304	1	1	1	1
0.013855	1	1	1	1
0.01467	1	1	1	1
0.015485	1	1	1	1
0.0163	1	1	1	1
0.017115	1	1	1	1
0.01793	1	1	1	1
0.018745	1	1	1	1
0.01956	1	1	1	1
0.020375	1	1	1	1
0.02119	1	1	1	1
0.022005	1	1	1	1
0.02282	1	1	1	1
0.023635	1	1	1	1
0.02445	1	1	1	1
0.025265	0.964659	0.941755	0.923156	0.981173
0.02608	0.70445	0.591611	0.457624	0.834895
0.026895	0.562478	0.461672	0.310657	0.67536
0.02771	0.421708	0.342961	0.191755	0.291509
0.028525	0.323823	0.271036	0.137906	0.083133
0.02934	0.235072	0.174945	0.105543	0.120895
0.030155	0.154997	0.097986	0.039251	0.1293
0.03097	0.095162	0.088556	0.006985	0.110094
0.031785	0.065051	0.042183	0.011248	0.089922
0.0326	0.046784	0.03271	-0.003291	0.115628
0.033415	0.027827	0.011518	-0.001126	0.129525
0.03423	0.032023	0.008312	0.012834	0.12922
0.035045	0.025601	0.00379	0.022355	0.127625
0.03586	0.022696	0.024954	0.027005	0.164172
0.036675	0.021334	0.03354	0.02135	0.18816
0.03749	0.013218	0.029187	-0.002359	0.210007
0.038305	0.020497	0.032607	0.005468	0.240935
0.03912	0.019019	0.033135	0.027301	0.212803
0.039935	0.009151	0.035534	0.032864	0.139325
0.04075	0.006418	0.028663	0.028523	0.08047
0.041565	0.016222	0.022758	0.018693	0.029386
0.04238	0.021598	0.024678	0.019677	0.010675
0.043195	0.0387	0.035093	0.015632	-0.001295
0.04401	0.027575	0.030146	0.009523	-0.006497
0.044825	0.037508	0.024496	0.005805	-0.004669
0.04564	0.010487	0.012543	0.017782	0.002327
0.046455	0.020297	0.007099	0.015146	0.01555
0.04727	0.021291	0.011027	0.009572	0.010423
0.048085	0.017369	0.008559	0.020729	0.002223
0.0489	0.021976	0.023986	0.008984	0.010491
0.049715	0.034429	0.016963	0.014508	0.016857
0.05053	0.030173	0.017706	0.004824	0.006177
0.051345	0.018396	0.014966	0.0129	0.009563
0.05216	0.012473	0.022871	0.007784	0.012196
0.052975	0.020367	0.014284	-0.00277	0.002701
0.05379	0.030828	0.010973	0.004341	0.003409
0.054605	0.013739	0.025211	0.002147	0.001832
0.05542	0.011345	0.026591	-0.00383	0.007221
0.056235	0.013677	0.011057	0.004302	0.011007
0.05705	-0.001268	0.00587	0.013611	0.002294
0.057865	0.005752	0.004603	0.010854	-0.000272708
0.05868	0.008918	0.003085	0.018447	-0.000169516
0.059495	0.018124	0.007128	0.009098	0.000595726
0.06031	0.004161	0.002768	0.010797	0.003383
0.061125	0.008085	0.012388	0.018924	0.006202
